# Supplementary material
Source: publisher site journal article supplement (https://www.dovepress.com/article/228958)
Supplement: Supplementary file 1 [file get_supplementary_file.php]

Supplementary Information

**GOLD classifications, COPD hospitalization, and all-cause mortality in chronic obstructive pulmonary disease: The HUNT Study**

Laxmi Bhatta 1*, Linda Leivseth 2, Xiao-Mei Mai 1,Anne Hildur Henriksen 3,4, David Carslake 5,6,Yue Chen 7, Arnulf Langhammer 8 **#**,Ben Michael Brumpton 4,5,9 **#**

1Department of Public Health and Nursing, NTNU Norwegian University of Science and Technology, Trondheim, Norway

2Centre for Clinical Documentation and Evaluation (SKDE), Northern Norway Regional Health Authority, Tromsø, Norway

3Department of Circulation and Medical Imaging, NTNU Norwegian University of Science and Technology, Trondheim, Norway

4Clinic of Thoracic and Occupational Medicine, St. Olavs Hospital, Trondheim University Hospital, Trondheim, Norway

5MRC Integrative Epidemiology Unit at the University of Bristol, Bristol, UK

6Population Health Sciences, University of Bristol, Bristol, UK

7School of Epidemiology and Public Health, University of Ottawa, Ottawa, Canada

8HUNT Research Centre, NTNU Norwegian University of Science and Technology, Levanger, Norway

9K.G. Jebsen Center for Genetic Epidemiology, NTNU Norwegian University of Science and Technology, Trondheim, Norway

**#**- Equal contributions

*- Corresponding author: Laxmi Bhatta [laxmi.bhatta@ntnu.no](mailto:laxmi.bhatta@ntnu.no) , Department of Public Health and Nursing, Faculty of Medicine and Health Sciences, NTNU Norwegian University of Science and Technology, P.O. Box 8905, MTFS, NO-7491, Trondheim, Norway

# Figure S1. Flow chart – Selection of participants aged ≥40 years in the HUNT2 study

N= 1300

All participants with COPD*

**Participants having persistent airflow limitation (post-bronchodilator FEV1/FVC<0.70) concurrent with respiratory symptoms (daily cough in periods, cough with phlegm, wheezing, and dyspnea) or self-reported doctor-diagnosed COPD*

N= 5678

Invited to post-bronchodilator spirometry

(Performed β2-agonist reversibility test)

(Invitation based on random & symptom sample from rural and airflow limitation sample from urban municipalities)

*(Airflow limitation criteria based on pre-bronchodilator measurements and defined as FEV1/FVC <0.75 or FEV1<80% of predicted by European Coal and Steel Community (ECSC) equations)*

N= 59006

Invited to HUNT2 (1995-1997)

N= 44384

Participated in HUNT2

N= 3261

Participated and acceptable spirometry

N=3529

Participated in spirometry

N= 4821

Invited symptom sample

N= 857

Invited random sample

N= 649

Participated in spirometry

N= 579

Participated and acceptable spirometry

N= 9423

Invited to the HUNT2 Lung Study (performed pre-bronchodilator spirometry)

5% random sample (N=2300 from 37261)

symptom sample (N=7123)

N= 1234

Participants with COPD*

N= 66

Participants with COPD*

| **Airflow limitation** | *ppFEV1 <50%* | **C** | **D** | *≥2* | **Exacerbation** **history** |
| --- | --- | --- | --- | --- | --- |
|
| *ppFEV1 ≥50%* | **A** | **B** | *<2* |
|
|  |  | *mMRC <2* | *mMRC ≥2* |  |  |
|  |  | **Symptom** | |  |  |

| **High risk** | **C** | **D** | *≥2 exacerbation history*  ***OR***  *ppFEV1 <50%* |
| --- | --- | --- | --- |
| **Low risk** | **A** | **B** | *<2 exacerbation history*  ***AND***  *ppFEV1 ≥50%* |
|  | *mMRC <2* | *mMRC ≥2* |  |
|  | **Low symptom** | **High symptom** |  |

# Figure S2. GOLD 2011 classification of COPD.

# Figure S3. Cumulative incidence curves of GOLD classifications for COPD hospitalization and all-cause mortality among participants with COPD aged ≥40 years in the HUNT2 study (N=1300).


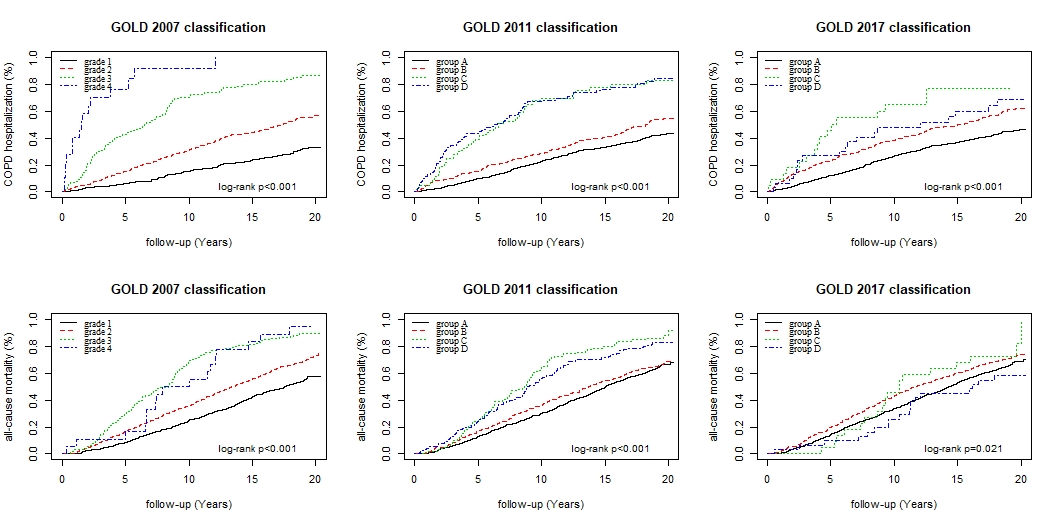


# Table S1. Lists of ICD codes for COPD hospitalizations.

|  | **ICD-10** | **ICD-9** |
| --- | --- | --- |
| *- Primary diagnosis | Bronchitis, not specified as acute or chronic * *J40* | Chronic airway obstruction, not elsewhere classified * *496* |
| Simple and mucopurulent chronic bronchitis *  *J41* | Bronchitis, not specified as acute or chronic * *490* |
| Unspecified chronic bronchitis * *J42* | Bronchitis, not specified as acute or chronic * *490* |
| Emphysema * *J43* | Emphysema * *492* |
| Other chronic obstructive pulmonary disease (COPD) * *J44* | Chronic bronchitis * *491* |
| #- Primary diagnosis but in combination with a secondary diagnosis of J40-J44 from ICD-10 or 490-492 and 496 from ICD-9 | Influenzas # *J09, J10, J11* | Influenzas # *487, 488* |
| Pneumonias # *J12 – J18* | Pneumonias # *480 – 486* |
| Dyspnoea # *R06.0* | Shortness of breath # 786.05 |
| Acute bronchitis # *J20* | Acute bronchitis # *466.0* |
| Unspecified acute lower respiratory infection # *J22* |  |
| Respiratory failure, not elsewhere classified # *J96* | Respiratory failure # *518.81, 518.83, 518.84* |

# Table S2. Akaike Information Criteria (AIC) for models predicting COPD hospitalization and all-cause mortality from GOLD 2007, GOLD 2011 and GOLD 2017 classifications among COPD participants aged ≥40 years in the HUNT2 study (N=1300).

| Outcomes | GOLD 2007 ¶ | GOLD 2011 ¥ | GOLD 2017 † |
| --- | --- | --- | --- |
| AIC ***** | AIC ***** | AIC ***** |
| COPD hospitalization | 6744 | 6808 | 6911 |
| All-cause mortality | 11860 | 11912 | 11961 |

Abbreviations: HUNT2 (Nord-Trøndelag Health Study 1995-1997), GLI (Global Lung Function Initiative), AIC (Akaike Information Criteria), BD (bronchodilator)

*- Model 1- the Cox model included GOLD 2007, GOLD 2011, or GOLD 2017.

¶ - grade 1 – percent-predicted forced expiratory volume in first second (ppFEV1) ≥80; grade 2 –80>ppFEV1≥50; grade 3 –50>ppFEV1≥30; grade 4 –ppFEV1<30

¥ - group A – ppFEV1≥50 and exacerbation history <2 and modified Medical Research Council dyspnoea scale (mMRC) <2; group B – ppFEV1≥50 and exacerbation history <2 and mMRC ≥2; group C – ppFEV1<50 or exacerbation history ≥2 and mMRC <2; group D – ppFEV1<50 or exacerbation history ≥2 and mMRC ≥2

†- group A – mMRC <2 & exacerbation history <2; group B – mMRC ≥2 & exacerbation history <2; group C – mMRC <2 & exacerbation history ≥2; group D – mMRC ≥2 & exacerbation history ≥2

# Table S3. Hazard ratios for GOLD 2007, GOLD 2011, and GOLD 2017 among participants with COPD aged ≥40 years in the HUNT2 study (N=1300).

| Outcomes | GOLD categories ¶, ¥, † | GOLD 2007 ¶ | GOLD 2011 ¥ | GOLD 2017 † |
| --- | --- | --- | --- | --- |
| HR (95% CI) **€** | HR (95% CI) **€** | HR (95% CI) **€** |
| COPD hospitalization | grade 1/ group A | Reference | Reference | Reference |
| grade 2/ group B | 1.93 (1.53-2.43) | 1.31 (1.05-1.64) | 1.50 (1.24-1.82) |
| grade 3/ group C | 4.57 (3.40-6.14) | 2.75 (2.05-3.70) | 2.30 (1.35-3.90) |
| grade 4/ group D | 14.57 (8.10-26.21) | 3.17 (2.42-4.16) | 1.63 (1.01-2.65) |
| All-cause mortality | grade 1/ group A | Reference | Reference | Reference |
| grade 2/ group B | 1.53 (1.31-1.80) | 0.97 (0.82-1.15) | 1.09 (0.94-1.27) |
| grade 3/ group C | 2.77 (2.22-3.46) | 1.60 (1.26-2.04) | 1.01 (0.62-1.63) |
| grade 4/ group D | 4.40 (2.59-7.47) | 1.95 (1.55-2.46) | 0.99 (0.61-1.61) |

Abbreviations: HUNT2 (Nord-Trøndelag Health Study 1995-1997), GOLD (global initiative for chronic obstructive lung disease), HR (Hazard ratio), CI (confidence interval), BD (bronchodilator)

**€**- Model 3- adjusted for age, sex, smoking, body mass index, education, physical activity, cardiovascular diseases, asthma ever, diabetes ever, systolic blood pressure, and cholesterol

¶ - grade 1 – percent-predicted forced expiratory volume in first second (ppFEV1) ≥80; grade 2 –80>ppFEV1≥50; grade 3 –50>ppFEV1≥30; grade 4 –ppFEV1<30

¥ - group A – ppFEV1≥50 and exacerbation history <2 and modified Medical Research Council dyspnoea scale (mMRC) <2; group B – ppFEV1≥50 and exacerbation history <2 and mMRC ≥2; group C – ppFEV1<50 or exacerbation history ≥2 and mMRC <2; group D – ppFEV1<50 or exacerbation history ≥2 and mMRC ≥2

†- group A – mMRC <2 & exacerbation history <2; group B – mMRC ≥2 & exacerbation history <2; group C – mMRC <2 & exacerbation history ≥2; group D – mMRC ≥2 & exacerbation history ≥2
